# Supplementary material for: Transcriptome analysis of near-isogenic line provides novel insights into genes associated with panicle traits regulation in rice
Source: PLoS One. 2018 Jun 20;13(6):e0199077. doi: 10.1371/journal.pone.0199077 (PMC6010284; doi:10.1371/journal.pone.0199077)
Supplement: S3 Table — (XLSX) [file pone.0199077.s009.xlsx]

## Sheet:  Table S3
S3 Table. GO enrichment analysis for the up-regulated genes.
GO_accession	Description	Term_type	Over_represented_pValue	Corrected_pValue	DEG_item	DEG_list	Bg_item	Bg_list	Gene_names (BGI locus ID)	Gene_names (TIGR locus ID)
GO:0010262	somatic embryogenesis	biological_process	1.4535e-06	0.011029	2	10	5	25883	BGIOSGA014808,BGIOSGA014806	LOC_Os04g41680，LOC_Os04g41620
GO:0004568	chitinase activity	molecular_function	3.6198e-05	0.039239	2	10	23	25883	BGIOSGA014808,BGIOSGA014806	LOC_Os04g41680，LOC_Os04g41620
GO:0006030	chitin metabolic process	biological_process	3.6198e-05	0.039239	2	10	23	25883	BGIOSGA014808,BGIOSGA014806	LOC_Os04g41680，LOC_Os04g41620
GO:0006032	chitin catabolic process	biological_process	3.6198e-05	0.039239	2	10	23	25883	BGIOSGA014808,BGIOSGA014806	LOC_Os04g41680，LOC_Os04g41620
GO:0046348	amino sugar catabolic process	biological_process	3.6198e-05	0.039239	2	10	23	25883	BGIOSGA014806,BGIOSGA014808	LOC_Os04g41680，LOC_Os04g41620
GO:1901071	glucosamine-containing compound metabolic process	biological_process	3.6198e-05	0.039239	2	10	23	25883	BGIOSGA014806,BGIOSGA014808	LOC_Os04g41680，LOC_Os04g41620
GO:1901072	glucosamine-containing compound catabolic process	biological_process	3.6198e-05	0.039239	2	10	23	25883	BGIOSGA014806,BGIOSGA014808	LOC_Os04g41680，LOC_Os04g41620
GO:0006026	aminoglycan catabolic process	biological_process	4.2945e-05	0.040734	2	10	25	25883	BGIOSGA014806,BGIOSGA014808	LOC_Os04g41680，LOC_Os04g41620
GO:0006040	amino sugar metabolic process	biological_process	6.1076e-05	0.051494	2	10	30	25883	BGIOSGA014808,BGIOSGA014806	LOC_Os04g41680，LOC_Os04g41620
GO:0006022	aminoglycan metabolic process	biological_process	8.6371e-05	0.063869	2	10	36	25883	BGIOSGA014806,BGIOSGA014808	LOC_Os04g41680，LOC_Os04g41620
GO:0016998	cell wall macromolecule catabolic process	biological_process	9.2588e-05	0.063869	2	10	37	25883	BGIOSGA014808,BGIOSGA014806	LOC_Os04g41680，LOC_Os04g41620
GO:1901136	carbohydrate derivative catabolic process	biological_process	0.00015568	0.098442	2	10	48	25883	BGIOSGA014808,BGIOSGA014806	LOC_Os04g41680，LOC_Os04g41620
GO:0016752	sinapoyltransferase activity	molecular_function	0.0004	0.23348	1	10	1	25883	BGIOSGA008839
GO:0032801	receptor catabolic process	biological_process	0.00080336	0.35858	1	10	2	25883	Novel00855
GO:0033644	host cell membrane	cellular_component	0.00080336	0.35858	1	10	2	25883	Novel00855
GO:0044218	other organism cell membrane	cellular_component	0.00080336	0.35858	1	10	2	25883	Novel00855
GO:0044279	other organism membrane	cellular_component	0.00080336	0.35858	1	10	2	25883	Novel00855
GO:0009057	macromolecule catabolic process	biological_process	0.00099427	0.41914	3	10	552	25883	BGIOSGA014806,BGIOSGA014808,Novel00855
GO:0019076	viral release from host cell	biological_process	0.0011215	0.44789	1	10	3	25883	Novel00855
GO:0043112	receptor metabolic process	biological_process	0.0012051	0.45722	1	10	3	25883	Novel00855
GO:0044036	cell wall macromolecule metabolic process	biological_process	0.0012942	0.46764	2	10	145	25883	BGIOSGA014806,BGIOSGA014808
GO:0009505	plant-type cell wall	cellular_component	0.0020363	0.70235	2	10	176	25883	BGIOSGA014808,BGIOSGA014806
GO:1901565	organonitrogen compound catabolic process	biological_process	0.0025226	0.83225	2	10	197	25883	BGIOSGA014808,BGIOSGA014806
GO:0016471	vacuolar proton-transporting V-type ATPase complex	cellular_component	0.0030025	0.94929	1	10	8	25883	BGIOSGA005784
GO:0048046	apoplast	cellular_component	0.0043894	1	2	10	260	25883	BGIOSGA014808,BGIOSGA014806
GO:0044248	cellular catabolic process	biological_process	0.0043953	1	3	10	921	25883	BGIOSGA014808,BGIOSGA014806,Novel00855
GO:0018995	host	cellular_component	0.0045087	1	1	10	12	25883	Novel00855
GO:0033643	host cell part	cellular_component	0.0045087	1	1	10	12	25883	Novel00855
GO:0043657	host cell	cellular_component	0.0045087	1	1	10	12	25883	Novel00855
GO:0044215	other organism	cellular_component	0.0045087	1	1	10	12	25883	Novel00855
GO:0044216	other organism cell	cellular_component	0.0045087	1	1	10	12	25883	Novel00855
GO:0044217	other organism part	cellular_component	0.0045087	1	1	10	12	25883	Novel00855
GO:0008061	chitin binding	molecular_function	0.0054602	1	1	10	14	25883	BGIOSGA014806
GO:0009793	embryo development ending in seed dormancy	biological_process	0.0055361	1	2	10	312	25883	BGIOSGA014808,BGIOSGA014806
GO:0022857	transmembrane transporter activity	molecular_function	0.0060144	1	3	10	1043	25883	Novel00855,BGIOSGA008884,BGIOSGA005784
GO:1901575	organic substance catabolic process	biological_process	0.0070117	1	3	10	1089	25883	BGIOSGA014808,BGIOSGA014806,Novel00855
GO:0048316	seed development	biological_process	0.0074277	1	2	10	361	25883	BGIOSGA014806,BGIOSGA014808	LOC_Os04g41680，LOC_Os04g41620
GO:0009790	embryo development	biological_process	0.0076914	1	2	10	367	25883	BGIOSGA014808,BGIOSGA014806
GO:0016787	hydrolase activity	molecular_function	0.0078377	1	5	10	3752	25883	BGIOSGA014806,BGIOSGA014808,BGIOSGA005785,BGIOSGA005784,BGIOSGA008839	LOC_Os04g41680, LOC_Os04g41620, LOC_Os02g47280, LOC_Os02g47320, LOC_Os02g46260
GO:0010154	fruit development	biological_process	0.0081109	1	2	10	377	25883	BGIOSGA014806,BGIOSGA014808
GO:0033176	proton-transporting V-type ATPase complex	cellular_component	0.008958	1	1	10	23	25883	BGIOSGA005784
GO:0009056	catabolic process	biological_process	0.0092652	1	3	10	1203	25883	Novel00855,BGIOSGA014806,BGIOSGA014808
GO:0019058	viral life cycle	biological_process	0.0099242	1	1	10	27	25883	Novel00855
GO:0071554	cell wall organization or biogenesis	biological_process	0.013786	1	2	10	483	25883	BGIOSGA014806,BGIOSGA014808
GO:0005215	transporter activity	molecular_function	0.014426	1	3	10	1427	25883	Novel00855,BGIOSGA008884,BGIOSGA005784
GO:0005261	cation channel activity	molecular_function	0.01469	1	1	10	39	25883	Novel00855
GO:0004553	hydrolase activity, hydrolyzing O-glycosyl compounds	molecular_function	0.015964	1	2	10	514	25883	BGIOSGA014808,BGIOSGA014806
GO:0016032	viral process	biological_process	0.016923	1	1	10	45	25883	Novel00855
GO:0005618	cell wall	cellular_component	0.01881	1	2	10	552	25883	BGIOSGA014808,BGIOSGA014806
GO:0016798	hydrolase activity, acting on glycosyl bonds	molecular_function	0.020022	1	2	10	578	25883	BGIOSGA014808,BGIOSGA014806
GO:0016469	proton-transporting two-sector ATPase complex	cellular_component	0.02106	1	1	10	55	25883	BGIOSGA005784
GO:0030312	external encapsulating structure	cellular_component	0.021262	1	2	10	591	25883	BGIOSGA014808,BGIOSGA014806
GO:0005576	extracellular region	cellular_component	0.022089	1	2	10	599	25883	BGIOSGA014806,BGIOSGA014808
GO:0044764	multi-organism cellular process	biological_process	0.024078	1	1	10	65	25883	Novel00855
GO:0004185	serine-type carboxypeptidase activity	molecular_function	0.026102	1	1	10	66	25883	BGIOSGA008839
GO:0004180	carboxypeptidase activity	molecular_function	0.027276	1	1	10	69	25883	BGIOSGA008839
GO:0070008	serine-type exopeptidase activity	molecular_function	0.028959	1	1	10	74	25883	BGIOSGA008839
GO:0044403	symbiosis, encompassing mutualism through parasitism	biological_process	0.034206	1	1	10	97	25883	Novel00855
GO:0044419	interspecies interaction between organisms	biological_process	0.034523	1	1	10	98	25883	Novel00855
GO:0048608	reproductive structure development	biological_process	0.035066	1	2	10	813	25883	BGIOSGA014808,BGIOSGA014806
GO:0061458	reproductive system development	biological_process	0.035066	1	2	10	813	25883	BGIOSGA014808,BGIOSGA014806
GO:0044702	single organism reproductive process	biological_process	0.038318	1	2	10	852	25883	BGIOSGA014808,BGIOSGA014806
GO:0005216	ion channel activity	molecular_function	0.039768	1	1	10	110	25883	Novel00855
GO:0006818	hydrogen transport	biological_process	0.040772	1	1	10	108	25883	BGIOSGA005784
GO:0015992	proton transport	biological_process	0.040772	1	1	10	108	25883	BGIOSGA005784
GO:0022838	substrate-specific channel activity	molecular_function	0.041704	1	1	10	115	25883	Novel00855
GO:0015267	channel activity	molecular_function	0.042378	1	1	10	117	25883	Novel00855
GO:0022803	passive transmembrane transporter activity	molecular_function	0.042378	1	1	10	117	25883	Novel00855
GO:0008238	exopeptidase activity	molecular_function	0.042975	1	1	10	111	25883	BGIOSGA008839
GO:0043170	macromolecule metabolic process	biological_process	0.043858	1	6	10	7750	25883	Novel01208,BGIOSGA014806,BGIOSGA014808,BGIOSGA005785,BGIOSGA008839,Novel00855
GO:0003006	developmental process involved in reproduction	biological_process	0.048878	1	2	10	972	25883	BGIOSGA014806,BGIOSGA014808
GO:0071944	cell periphery	cellular_component	0.049022	1	3	10	2247	25883	BGIOSGA014808,BGIOSGA005784,BGIOSGA014806
GO:1901135	carbohydrate derivative metabolic process	biological_process	0.04937	1	2	10	953	25883	BGIOSGA014808,BGIOSGA014806
GO:0016817	hydrolase activity, acting on acid anhydrides	molecular_function	0.05429	1	2	10	1078	25883	BGIOSGA005785,BGIOSGA005784	LOC_Os02g47280, LOC_Os02g47320
GO:0009791	post-embryonic development	biological_process	0.054571	1	2	10	1030	25883	BGIOSGA014806,BGIOSGA014808
GO:0005774	vacuolar membrane	cellular_component	0.064915	1	1	10	174	25883	BGIOSGA005784
GO:0022414	reproductive process	biological_process	0.065431	1	2	10	1148	25883	BGIOSGA014808,BGIOSGA014806
GO:0016820	hydrolase activity, acting on acid anhydrides, catalyzing transmembrane movement of substances	molecular_function	0.065431	1	1	10	196	25883	BGIOSGA005784
GO:0044437	vacuolar part	cellular_component	0.066637	1	1	10	179	25883	BGIOSGA005784
GO:0048731	system development	biological_process	0.075986	1	2	10	1240	25883	BGIOSGA014808,BGIOSGA014806
GO:0019748	secondary metabolic process	biological_process	0.077837	1	1	10	208	25883	BGIOSGA008839
GO:0008236	serine-type peptidase activity	molecular_function	0.086217	1	1	10	235	25883	BGIOSGA008839
GO:0017171	serine hydrolase activity	molecular_function	0.086217	1	1	10	235	25883	BGIOSGA008839
GO:0015672	monovalent inorganic cation transport	biological_process	0.092005	1	1	10	253	25883	BGIOSGA005784
GO:0044260	cellular macromolecule metabolic process	biological_process	0.098787	1	5	10	7000	25883	Novel00855,Novel01208,BGIOSGA014806,BGIOSGA005785,BGIOSGA014808
GO:0005975	carbohydrate metabolic process	biological_process	0.099392	1	2	10	1421	25883	BGIOSGA014808,BGIOSGA014806
GO:0098805	whole membrane	cellular_component	0.11151	1	1	10	308	25883	BGIOSGA005784
GO:0007275	multicellular organismal development	biological_process	0.12476	1	2	10	1646	25883	BGIOSGA014808,BGIOSGA014806
GO:0048856	anatomical structure development	biological_process	0.12626	1	2	10	1659	25883	BGIOSGA014808,BGIOSGA014806
GO:0044707	single-multicellular organism process	biological_process	0.12873	1	2	10	1678	25883	BGIOSGA014808,BGIOSGA014806
GO:0098796	membrane protein complex	cellular_component	0.13988	1	1	10	388	25883	BGIOSGA005784
GO:0097367	carbohydrate derivative binding	molecular_function	0.14542	1	3	10	3761	25883	BGIOSGA032326,BGIOSGA005785,BGIOSGA014806
GO:0005886	plasma membrane	cellular_component	0.14586	1	2	10	1778	25883	BGIOSGA005784,BGIOSGA014806
GO:0044767	single-organism developmental process	biological_process	0.14815	1	2	10	1823	25883	BGIOSGA014808,BGIOSGA014806
GO:0008324	cation transmembrane transporter activity	molecular_function	0.14867	1	1	10	424	25883	Novel00855
GO:0032501	multicellular organismal process	biological_process	0.15262	1	2	10	1868	25883	BGIOSGA014808,BGIOSGA014806
GO:0032502	developmental process	biological_process	0.15264	1	2	10	1856	25883	BGIOSGA014806,BGIOSGA014808
GO:0016747	transferase activity, transferring acyl groups other than amino-acyl groups	molecular_function	0.15704	1	1	10	428	25883	BGIOSGA008839
GO:0098588	bounding membrane of organelle	cellular_component	0.16891	1	1	10	479	25883	BGIOSGA005784
GO:0043531	ADP binding	molecular_function	0.17457	1	1	10	566	25883	BGIOSGA032326
GO:0071704	organic substance metabolic process	biological_process	0.1754	1	6	10	10576	25883	Novel00855,BGIOSGA014808,BGIOSGA005785,BGIOSGA008839,Novel01208,BGIOSGA014806
GO:0016746	transferase activity, transferring acyl groups	molecular_function	0.18624	1	1	10	516	25883	BGIOSGA008839
GO:1901564	organonitrogen compound metabolic process	biological_process	0.20645	1	2	10	2177	25883	BGIOSGA014808,BGIOSGA014806
GO:0006812	cation transport	biological_process	0.20647	1	1	10	599	25883	BGIOSGA005784
GO:0015075	ion transmembrane transporter activity	molecular_function	0.2115	1	1	10	622	25883	Novel00855
GO:0005773	vacuole	cellular_component	0.21421	1	1	10	612	25883	BGIOSGA005784
GO:0005575	cellular_component	cellular_component	0.22684	1	6	10	11242	25883	BGIOSGA008884,Novel00855,BGIOSGA014808,BGIOSGA005784,BGIOSGA005785,BGIOSGA014806
GO:0031090	organelle membrane	cellular_component	0.23362	1	1	10	679	25883	BGIOSGA005784
GO:0003824	catalytic activity	molecular_function	0.23377	1	6	10	11377	25883	Novel01208,BGIOSGA014806,BGIOSGA014808,BGIOSGA005785,BGIOSGA005784,BGIOSGA008839
GO:0022891	substrate-specific transmembrane transporter activity	molecular_function	0.25267	1	1	10	755	25883	Novel00855
GO:0070011	peptidase activity, acting on L-amino acid peptides	molecular_function	0.25327	1	1	10	748	25883	BGIOSGA008839
GO:0008233	peptidase activity	molecular_function	0.26078	1	1	10	774	25883	BGIOSGA008839
GO:0044425	membrane part	cellular_component	0.26535	1	2	10	2633	25883	BGIOSGA008884,BGIOSGA005784
GO:0044237	cellular metabolic process	biological_process	0.2708	1	5	10	9401	25883	Novel00855,BGIOSGA005785,BGIOSGA014808,BGIOSGA014806,Novel01208
GO:0022892	substrate-specific transporter activity	molecular_function	0.27724	1	1	10	841	25883	Novel00855
GO:0006811	ion transport	biological_process	0.2871	1	1	10	871	25883	BGIOSGA005784
GO:0006952	defense response	biological_process	0.29847	1	1	10	970	25883	BGIOSGA032326
GO:0016818	hydrolase activity, acting on acid anhydrides, in phosphorus-containing anhydrides	molecular_function	0.32028	1	1	10	1061	25883	BGIOSGA005785
GO:0016020	membrane	cellular_component	0.32324	1	3	10	5218	25883	BGIOSGA005784,BGIOSGA014806,BGIOSGA008884
GO:0044238	primary metabolic process	biological_process	0.3259	1	5	10	10010	25883	BGIOSGA014806,Novel01208,BGIOSGA008839,BGIOSGA005785,BGIOSGA014808
GO:0051704	multi-organism process	biological_process	0.3261	1	1	10	1023	25883	Novel00855
GO:0006508	proteolysis	biological_process	0.34145	1	1	10	1067	25883	BGIOSGA008839
GO:0006807	nitrogen compound metabolic process	biological_process	0.35244	1	3	10	5447	25883	BGIOSGA014808,BGIOSGA005785,BGIOSGA014806
GO:0032559	adenyl ribonucleotide binding	molecular_function	0.3536	1	2	10	3418	25883	BGIOSGA005785,BGIOSGA032326
GO:0003674	molecular_function	molecular_function	0.35796	1	10	10	23400	25883	BGIOSGA008851,Novel00855,BGIOSGA008884,BGIOSGA014806,BGIOSGA014808,BGIOSGA008839,BGIOSGA032326,Novel01208,BGIOSGA005784,BGIOSGA005785
GO:0030554	adenyl nucleotide binding	molecular_function	0.35976	1	2	10	3459	25883	BGIOSGA005785,BGIOSGA032326
GO:0001883	purine nucleoside binding	molecular_function	0.3907	1	2	10	3668	25883	BGIOSGA032326,BGIOSGA005785
GO:0032550	purine ribonucleoside binding	molecular_function	0.3907	1	2	10	3668	25883	BGIOSGA005785,BGIOSGA032326
GO:0032555	purine ribonucleotide binding	molecular_function	0.39115	1	2	10	3671	25883	BGIOSGA005785,BGIOSGA032326
GO:0032549	ribonucleoside binding	molecular_function	0.39194	1	2	10	3678	25883	BGIOSGA032326,BGIOSGA005785
GO:0001882	nucleoside binding	molecular_function	0.39205	1	2	10	3679	25883	BGIOSGA005785,BGIOSGA032326
GO:0017076	purine nucleotide binding	molecular_function	0.39738	1	2	10	3713	25883	BGIOSGA032326,BGIOSGA005785
GO:0032553	ribonucleotide binding	molecular_function	0.39949	1	2	10	3727	25883	BGIOSGA005785,BGIOSGA032326
GO:0043234	protein complex	cellular_component	0.43676	1	1	10	1468	25883	BGIOSGA005784
GO:0008152	metabolic process	biological_process	0.43691	1	6	10	13571	25883	Novel00855,Novel01208,BGIOSGA014806,BGIOSGA014808,BGIOSGA005785,BGIOSGA008839
GO:0005623	cell	cellular_component	0.43853	1	4	10	8611	25883	BGIOSGA014806,BGIOSGA005784,BGIOSGA014808,BGIOSGA005785
GO:0044464	cell part	cellular_component	0.43853	1	4	10	8611	25883	BGIOSGA014806,BGIOSGA014808,BGIOSGA005785,BGIOSGA005784
GO:0008150	biological_process	biological_process	0.44868	1	8	10	18797	25883	BGIOSGA032326,Novel01208,BGIOSGA005785,BGIOSGA005784,Novel00855,BGIOSGA014806,BGIOSGA008839,BGIOSGA014808
GO:0004672	protein kinase activity	molecular_function	0.45115	1	1	10	1580	25883	Novel01208
GO:0008270	zinc ion binding	molecular_function	0.46569	1	1	10	1588	25883	BGIOSGA008851
GO:0006468	protein phosphorylation	biological_process	0.46933	1	1	10	1662	25883	Novel01208
GO:0043168	anion binding	molecular_function	0.48471	1	2	10	4321	25883	BGIOSGA032326,BGIOSGA005785
GO:0016773	phosphotransferase activity, alcohol group as acceptor	molecular_function	0.49355	1	1	10	1778	25883	Novel01208
GO:0016740	transferase activity	molecular_function	0.5	1	2	10	4279	25883	BGIOSGA008839,Novel01208
GO:0016301	kinase activity	molecular_function	0.50459	1	1	10	1830	25883	Novel01208
GO:0009987	cellular process	biological_process	0.50899	1	5	10	11879	25883	Novel00855,BGIOSGA005785,BGIOSGA014808,Novel01208,BGIOSGA014806
GO:0019538	protein metabolic process	biological_process	0.51382	1	2	10	4386	25883	BGIOSGA008839,Novel01208
GO:0000166	nucleotide binding	molecular_function	0.51762	1	2	10	4560	25883	BGIOSGA032326,BGIOSGA005785
GO:1901265	nucleoside phosphate binding	molecular_function	0.51762	1	2	10	4560	25883	BGIOSGA032326,BGIOSGA005785
GO:0044699	single-organism process	biological_process	0.51887	1	4	10	9414	25883	BGIOSGA008839,BGIOSGA014808,BGIOSGA005784,BGIOSGA014806
GO:0016310	phosphorylation	biological_process	0.53071	1	1	10	1960	25883	Novel01208
GO:0036094	small molecule binding	molecular_function	0.535	1	2	10	4692	25883	BGIOSGA032326,BGIOSGA005785
GO:0006355	regulation of transcription, DNA-templated	biological_process	0.53919	1	1	10	1924	25883	BGIOSGA005785
GO:1903506	regulation of nucleic acid-templated transcription	biological_process	0.53919	1	1	10	1924	25883	BGIOSGA005785
GO:2001141	regulation of RNA biosynthetic process	biological_process	0.53919	1	1	10	1924	25883	BGIOSGA005785
GO:0051252	regulation of RNA metabolic process	biological_process	0.5419	1	1	10	1938	25883	BGIOSGA005785
GO:0019219	regulation of nucleobase-containing compound metabolic process	biological_process	0.5552	1	1	10	2015	25883	BGIOSGA005785
GO:0032991	macromolecular complex	cellular_component	0.55629	1	1	10	2030	25883	BGIOSGA005784
GO:0010556	regulation of macromolecule biosynthetic process	biological_process	0.56402	1	1	10	2060	25883	BGIOSGA005785
GO:2000112	regulation of cellular macromolecule biosynthetic process	biological_process	0.56402	1	1	10	2060	25883	BGIOSGA005785
GO:0031326	regulation of cellular biosynthetic process	biological_process	0.56769	1	1	10	2081	25883	BGIOSGA005785
GO:0009889	regulation of biosynthetic process	biological_process	0.57112	1	1	10	2100	25883	BGIOSGA005785
GO:0006351	transcription, DNA-templated	biological_process	0.57402	1	1	10	2116	25883	BGIOSGA005785
GO:0097659	nucleic acid-templated transcription	biological_process	0.57402	1	1	10	2116	25883	BGIOSGA005785
GO:0051171	regulation of nitrogen compound metabolic process	biological_process	0.57416	1	1	10	2120	25883	BGIOSGA005785
GO:0032774	RNA biosynthetic process	biological_process	0.57457	1	1	10	2119	25883	BGIOSGA005785
GO:0044765	single-organism transport	biological_process	0.57739	1	1	10	2161	25883	BGIOSGA005784
GO:0016772	transferase activity, transferring phosphorus-containing groups	molecular_function	0.57879	1	1	10	2236	25883	Novel01208
GO:0010468	regulation of gene expression	biological_process	0.58071	1	1	10	2160	25883	BGIOSGA005785
GO:1902578	single-organism localization	biological_process	0.58208	1	1	10	2188	25883	BGIOSGA005784
GO:0016021	integral component of membrane	cellular_component	0.58542	1	1	10	2214	25883	BGIOSGA008884
GO:0031224	intrinsic component of membrane	cellular_component	0.59794	1	1	10	2285	25883	BGIOSGA008884
GO:0080090	regulation of primary metabolic process	biological_process	0.60213	1	1	10	2280	25883	BGIOSGA005785
GO:0031323	regulation of cellular metabolic process	biological_process	0.60586	1	1	10	2301	25883	BGIOSGA005785
GO:0060255	regulation of macromolecule metabolic process	biological_process	0.61058	1	1	10	2338	25883	BGIOSGA005785
GO:0043167	ion binding	molecular_function	0.61665	1	3	10	7955	25883	BGIOSGA005785,BGIOSGA032326,BGIOSGA008851
GO:0034654	nucleobase-containing compound biosynthetic process	biological_process	0.6212	1	1	10	2397	25883	BGIOSGA005785
GO:0006464	cellular protein modification process	biological_process	0.63451	1	1	10	2573	25883	Novel01208
GO:0036211	protein modification process	biological_process	0.63451	1	1	10	2573	25883	Novel01208
GO:0005634	nucleus	cellular_component	0.63878	1	1	10	2509	25883	BGIOSGA005785
GO:0006950	response to stress	biological_process	0.63951	1	1	10	2583	25883	BGIOSGA032326
GO:0046914	transition metal ion binding	molecular_function	0.64237	1	1	10	2528	25883	BGIOSGA008851
GO:0019222	regulation of metabolic process	biological_process	0.65679	1	1	10	2636	25883	BGIOSGA005785
GO:0044446	intracellular organelle part	cellular_component	0.65809	1	1	10	2637	25883	BGIOSGA005784
GO:0044422	organelle part	cellular_component	0.66004	1	1	10	2650	25883	BGIOSGA005784
GO:0018130	heterocycle biosynthetic process	biological_process	0.66637	1	1	10	2688	25883	BGIOSGA005785
GO:0043412	macromolecule modification	biological_process	0.6686	1	1	10	2807	25883	Novel01208
GO:0019438	aromatic compound biosynthetic process	biological_process	0.66881	1	1	10	2704	25883	BGIOSGA005785
GO:0005524	ATP binding	molecular_function	0.66943	1	1	10	2876	25883	BGIOSGA005785
GO:0006810	transport	biological_process	0.67988	1	1	10	2811	25883	BGIOSGA005784
GO:0006796	phosphate-containing compound metabolic process	biological_process	0.68095	1	1	10	2864	25883	Novel01208
GO:0006793	phosphorus metabolic process	biological_process	0.68515	1	1	10	2894	25883	Novel01208
GO:0043227	membrane-bounded organelle	cellular_component	0.68687	1	2	10	5724	25883	BGIOSGA005784,BGIOSGA005785
GO:0043231	intracellular membrane-bounded organelle	cellular_component	0.68687	1	2	10	5724	25883	BGIOSGA005785,BGIOSGA005784
GO:1901362	organic cyclic compound biosynthetic process	biological_process	0.68744	1	1	10	2835	25883	BGIOSGA005785
GO:0051234	establishment of localization	biological_process	0.68892	1	1	10	2878	25883	BGIOSGA005784
GO:0016070	RNA metabolic process	biological_process	0.69682	1	1	10	2923	25883	BGIOSGA005785
GO:0051179	localization	biological_process	0.70024	1	1	10	2968	25883	BGIOSGA005784
GO:0035639	purine ribonucleoside triphosphate binding	molecular_function	0.70347	1	1	10	3127	25883	BGIOSGA005785
GO:0043229	intracellular organelle	cellular_component	0.73429	1	2	10	6217	25883	BGIOSGA005785,BGIOSGA005784
GO:0043226	organelle	cellular_component	0.7357	1	2	10	6232	25883	BGIOSGA005784,BGIOSGA005785
GO:0044271	cellular nitrogen compound biosynthetic process	biological_process	0.74505	1	1	10	3291	25883	BGIOSGA005785
GO:0050794	regulation of cellular process	biological_process	0.75161	1	1	10	3378	25883	BGIOSGA005785
GO:0010467	gene expression	biological_process	0.75475	1	1	10	3392	25883	BGIOSGA005785
GO:0034645	cellular macromolecule biosynthetic process	biological_process	0.75476	1	1	10	3414	25883	BGIOSGA005785
GO:0009059	macromolecule biosynthetic process	biological_process	0.75999	1	1	10	3463	25883	BGIOSGA005785
GO:0090304	nucleic acid metabolic process	biological_process	0.76465	1	1	10	3527	25883	BGIOSGA005785
GO:0044267	cellular protein metabolic process	biological_process	0.7816	1	1	10	3732	25883	Novel01208
GO:0050789	regulation of biological process	biological_process	0.80022	1	1	10	3873	25883	BGIOSGA005785
GO:0046872	metal ion binding	molecular_function	0.81491	1	1	10	4004	25883	BGIOSGA008851
GO:0006139	nucleobase-containing compound metabolic process	biological_process	0.81744	1	1	10	4086	25883	BGIOSGA005785
GO:0043169	cation binding	molecular_function	0.81936	1	1	10	4059	25883	BGIOSGA008851
GO:0050896	response to stimulus	biological_process	0.81992	1	1	10	4157	25883	BGIOSGA032326
GO:0065007	biological regulation	biological_process	0.82087	1	1	10	4113	25883	BGIOSGA005785
GO:0044424	intracellular part	cellular_component	0.82142	1	2	10	7310	25883	BGIOSGA005785,BGIOSGA005784
GO:0005622	intracellular	cellular_component	0.83695	1	2	10	7542	25883	BGIOSGA005785,BGIOSGA005784
GO:0046483	heterocycle metabolic process	biological_process	0.84358	1	1	10	4414	25883	BGIOSGA005785
GO:0006725	cellular aromatic compound metabolic process	biological_process	0.84814	1	1	10	4478	25883	BGIOSGA005785
GO:0044444	cytoplasmic part	cellular_component	0.85204	1	1	10	4481	25883	BGIOSGA005784
GO:1901360	organic cyclic compound metabolic process	biological_process	0.85541	1	1	10	4580	25883	BGIOSGA005785
GO:0044249	cellular biosynthetic process	biological_process	0.87633	1	1	10	4889	25883	BGIOSGA005785
GO:0034641	cellular nitrogen compound metabolic process	biological_process	0.88077	1	1	10	4976	25883	BGIOSGA005785
GO:1901576	organic substance biosynthetic process	biological_process	0.88105	1	1	10	4970	25883	BGIOSGA005785
GO:0005737	cytoplasm	cellular_component	0.88456	1	1	10	5002	25883	BGIOSGA005784
GO:1901363	heterocyclic compound binding	molecular_function	0.89098	1	2	10	8712	25883	BGIOSGA005785,BGIOSGA032326
GO:0097159	organic cyclic compound binding	molecular_function	0.89127	1	2	10	8718	25883	BGIOSGA005785,BGIOSGA032326
GO:0009058	biosynthetic process	biological_process	0.89595	1	1	10	5245	25883	BGIOSGA005785
GO:0044710	single-organism metabolic process	biological_process	0.91101	1	1	10	5561	25883	BGIOSGA008839
GO:0005515	protein binding	molecular_function	0.91318	1	1	10	5731	25883	BGIOSGA008851
GO:0005488	binding	molecular_function	0.94101	1	4	10	15583	25883	BGIOSGA005785,BGIOSGA014806,BGIOSGA032326,BGIOSGA008851
